# Supplementary material
Source: ML conference proceedings conference paper supplement (https://proceedings.neurips.cc/paper_files/paper/2018/hash/6ecbdd6ec859d284dc13885a37ce8d81-Abstract.html)
Supplement: Supplementary file [file 6ecbdd6ec859d284dc13885a37ce8d81-Supplemental.zip]

---

# Supplementary material:

## *Deep Neural Nets with Interpolating Function as Output Activation*

---

**Bao Wang**  
Department of Mathematics  
University of California, Los Angeles  
wangbaonj@gmail.com  
**Zhen Li**  
Department of Mathematics  
HKUST, Hong Kong  
lishen03@gmail.com  
**Zuoqiang Shi**  
Department of Mathematics  
Tsinghua University  
zqshi@mail.tsinghua.edu.cn

**Xiyang Luo**  
Department of Mathematics  
University of California, Los Angeles  
xylmath@gmail.com  
**Wei Zhu**  
Department of Mathematics  
Duke University  
zhu@math.duke.edu  
**Stanley J. Osher**  
Department of Mathematics  
University of California, Los Angeles  
sjo@math.ucla.edu

### A Proof of Theorem 1

*Proof.* Let  $X_i, i = 1, 2, \dots, N$ , be the number of additional data needed to obtain the  $i$ -type after  $(i - 1)$  distinct types have been sampled. The total number of instances needed is:

$$X = X_1 + X_2 + \dots + X_N = \sum_{i=1}^N X_i.$$

For any  $i$ ,  $i - 1$  distinct types of instances have already been sampled. It follows that the probability of a new instance being of a different type is  $1 - \frac{i-1}{N} = \frac{N-i+1}{N}$ . Essentially, to obtain the  $i$ -th distinct type, the random variable  $X$  follows a geometric distribution with  $p = \frac{N-i+1}{N}$  and  $E[X_i] = \frac{N}{N-i+1}$ . Thus, we have

$$E[X] = \sum_{i=1}^N E[X_i] = \sum_{i=1}^N \frac{N}{N-i+1}.$$

Asymptotically,  $E[X] \approx N \ln N$  for sufficiently large  $N$ . □

### B Results on SVHN data

For the SVHN recognition task, we simply test the performance when the full training data are used. Here we only test the performance of the ResNets and pre-activated ResNets. There is a relative 7%-10% error rate reduction for all these DNNs.

Table 1: Error rates of the vanilla DNNs v.s. the WNLL activated DNNs over the whole SVHN dataset. (Median of 5 independent trials)

| <b>Network</b> | <b>Vanilla DNNs</b> | <b>WNLL DNNs</b> |
|----------------|---------------------|------------------|
| ResNet20       | 3.76%               | <b>3.44%</b>     |
| ResNet32       | 3.28%               | <b>2.96%</b>     |
| ResNet44       | 2.84%               | <b>2.56%</b>     |
| ResNet56       | 2.64%               | <b>2.32%</b>     |
| ResNet110      | 2.55%               | <b>2.26%</b>     |
| ResNet18       | 3.96%               | <b>3.65%</b>     |
| ResNet34       | 3.81%               | <b>3.54%</b>     |
| PreActResNet18 | 4.03%               | <b>3.70%</b>     |
| PreActResNet34 | 3.66%               | <b>3.32%</b>     |
